# Supplementary material
Source: publisher figshare collection journal article supplement (https://frontiersin.figshare.com/ndownloader/files/34325849)
Supplement: Supplementary file [file 34325849]

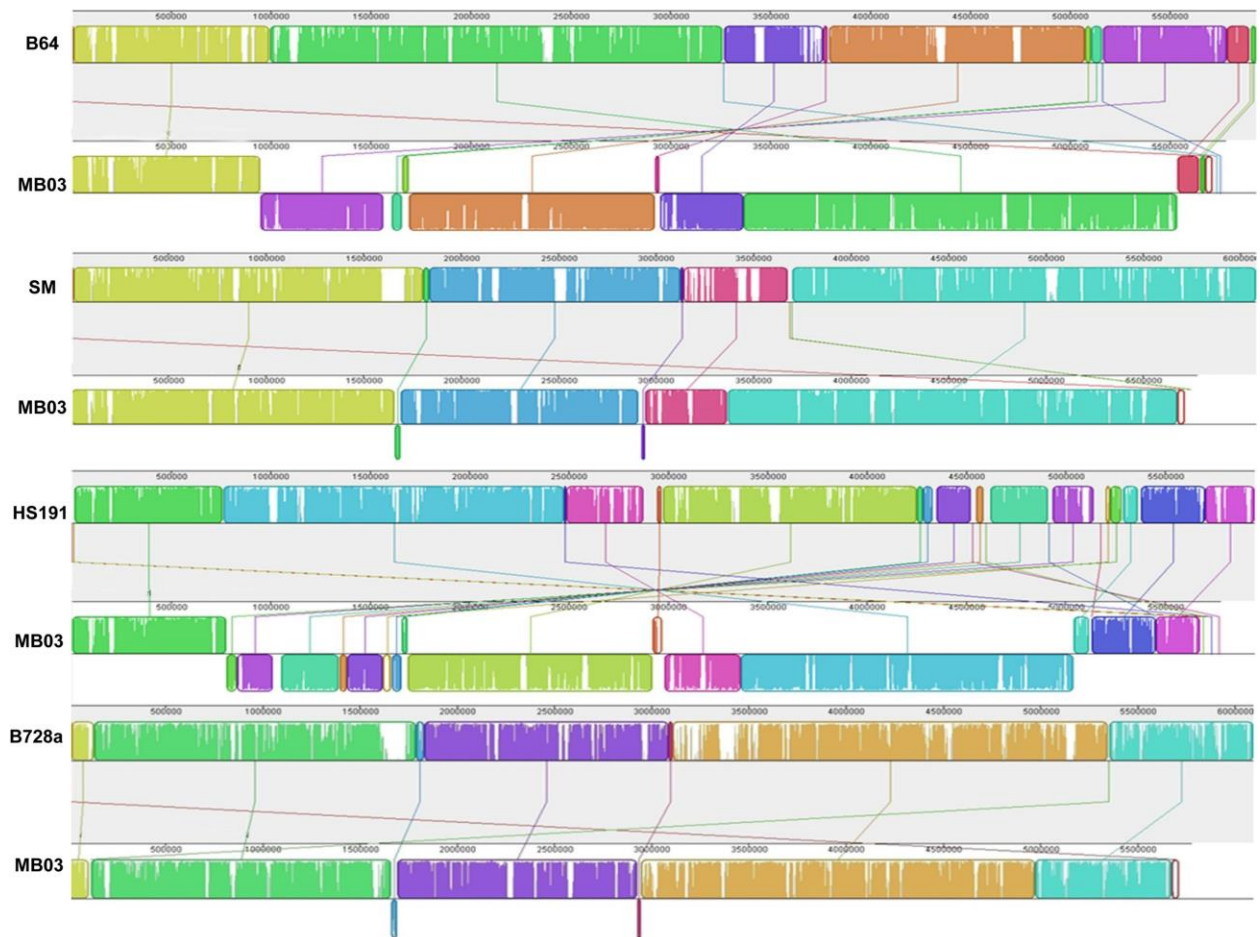

**Figure S2.** Genome alignment of *P. syringae* MB03 with other strains. The genome of *P. syringae* MB03 was aligned with other strains including *P. syringae* pv. *syringae* B64, *P. syringae* pv. *syringae* SM, *P. syringae* pv. *syringae* HS191 and *P. syringae* pv. *syringae* B728a. Before genomic alignment, the contigs of MB03 were ordered using Mauve. In each sub-figure, the upper colored line represents the reference genome and the lower one represents the MB03 genome. Colorless regions show unique features of the respective genomes. The numerical values on top of each panel represents nucleotide coordinates. Connecting lines are inferring synteny between two genome assemblies.
